# Supplementary material for: Color Variation and Secondary Metabolites’ Footprint in a Taxonomic Complex of Phyteuma sp. (Campanulaceae)
Source: MDPI journal article supplement (doi:10.3390/plants11212894), 2022-10-28
Supplement: s1 [file s1]

**Table S1.** Phenolic compounds content (mean  $\pm$  SD, in mg/100 g of FW) in selected populations of *Phyteuma*. Different letters in the table indicate statistical significance ( $p \leq 0.05$ ) in compound content between populations.

| Peak                  | Compound                                          | PSS-1                | PSS-2                | PSC                   | PO-V                | PO-DV                 | PO-P                  | PP                 |
|-----------------------|---------------------------------------------------|----------------------|----------------------|-----------------------|---------------------|-----------------------|-----------------------|--------------------|
| <b>Phenolic acids</b> |                                                   |                      |                      |                       |                     |                       |                       |                    |
| 1                     | <i>p</i> -Coumaric acid hexoside derivative       | -                    | -                    | -                     | 6.3 $\pm$ 0.3 b     | 4.6 $\pm$ 2.0 a,b     | 12.1 $\pm$ 2.5 c      | 2.1 $\pm$ 0.1 a    |
| 2                     | <i>p</i> -Hydroxybenzoic acid hexose              | 1.3 $\pm$ 1.0 a      | 1.1 $\pm$ 0.8 a      | 0.6 $\pm$ 0.3 a       | -                   | -                     | -                     | -                  |
| 3                     | <i>p</i> -Coumaric acid derivative                | 2.6 $\pm$ 0.8 a      | 3.8 $\pm$ 0.2 a      | 2.5 $\pm$ 0.6 a       | 2.5 $\pm$ 0.8 a     | 3.3 $\pm$ 0.2 a       | 5.6 $\pm$ 2.3 a       | 6.2 $\pm$ 2.2 a    |
| 4                     | Neochlorogenic acid                               | -                    | -                    | -                     | -                   | -                     | -                     | 6.4 $\pm$ 0.4      |
| 5                     | Caffeoylquinic acid der.                          | 8.8 $\pm$ 2.3 a      | 10.9 $\pm$ 7.3 a     | 6.7 $\pm$ 1.2 a       | -                   | -                     | -                     | 4.1 $\pm$ 0.1 a    |
| 6                     | Coumaroylquinic acid derivative 1                 | 32.7 $\pm$ 12.9 a    | 20.7 $\pm$ 7.5 a     | 14.6 $\pm$ 0.5 a      | 23.9 $\pm$ 7.0 a    | 18.1 $\pm$ 0.4 a      | 38.3 $\pm$ 10.4 a     | 30.6 $\pm$ 18.0 a  |
| 7                     | Cryptochlorogenic acid                            | 7.2 $\pm$ 0.8 a      | 15.1 $\pm$ 12.3 a    | 3.8 $\pm$ 0.5 a       | 4.1 $\pm$ 0.4 a     | 2.8 $\pm$ 0.4 a       | 7.6 $\pm$ 0.6 a       | -                  |
| 8                     | Feruloylquinic acid derivative 1                  | -                    | -                    | -                     | -                   | -                     | -                     | 2.2 $\pm$ 0.3      |
| 9                     | Ferulic acid hexoside                             | 1.5 $\pm$ 0.5 a      | 1.0 $\pm$ 0.1 a      | 1.9 $\pm$ 0.3 a       | -                   | -                     | -                     | -                  |
| 10                    | <i>p</i> -coumaric-caffeoylquinic acid derivative | -                    | -                    | -                     | -                   | -                     | -                     | 8.8 $\pm$ 0.6      |
| 11                    | Coumaroylquinic acid derivative 2                 | 21.3 $\pm$ 2.2 c     | 11.0 $\pm$ 0.2 b,c   | 7.4 $\pm$ 1.2 a,b     | 2.0 $\pm$ 0.2 a,b   | 2.7 $\pm$ 0.5 a,b     | 4.6 $\pm$ 0.8 a,b     | 0.3 $\pm$ 0.1 a    |
| 12                    | Feruloylquinic acid derivative 2                  | -                    | -                    | -                     | -                   | -                     | -                     | 2.3 $\pm$ 1.5      |
| 13                    | Ferulic acid derivative                           | 2.4 $\pm$ 1.1 a      | 3.3 $\pm$ 0.7 a      | 4.0 $\pm$ 0.7 a       | -                   | -                     | -                     | -                  |
| 14                    | Coumaroylquinic acid derivative 4                 | 5.8 $\pm$ 2.2 b      | 3.0 $\pm$ 1.9 a,b    | 4.3 $\pm$ 1.2 a,b     | 1.9 $\pm$ 0.2 a     | 1.5 $\pm$ 0.3 a       | 6.9 $\pm$ 1.5 b       | -                  |
| <b>Flavonols</b>      |                                                   |                      |                      |                       |                     |                       |                       |                    |
| 15                    | Kaempferol-3- <i>O</i> -rutinoside                | -                    | -                    | -                     | 1.0 $\pm$ 0.6 a     | 0.5 $\pm$ 0.4 a       | 13.8 $\pm$ 2.5 b      | 10.2 $\pm$ 2.2 b   |
| 16                    | Luteolin 7-rutinoside glucoside                   | 29.8 $\pm$ 21.5 a    | 17.9 $\pm$ 15.0 a    | 8.9 $\pm$ 6.5 a       | -                   | -                     | -                     | -                  |
| 17                    | Quercetin hexoside dirhamnoside                   | -                    | -                    | -                     | 26.4 $\pm$ 3.9 a    | 25.0 $\pm$ 12.8 a     | 104.4 $\pm$ 14.0 b    | -                  |
| 18                    | Quercetin 3-rutinoside 1                          | -                    | -                    | -                     | 1.1 $\pm$ 0.4 a     | 0.9 $\pm$ 0.2 a       | 2.5 $\pm$ 0.5 a       | 8.4 $\pm$ 0.9 b    |
| 19                    | Kaempferol derivative 2                           | -                    | -                    | -                     | -                   | -                     | -                     | 2.8 $\pm$ 0.4      |
| 20                    | Luteolin 7-rutinoside                             | 3386.1 $\pm$ 542.3 c | 2392.3 $\pm$ 959.0 c | 746.7 $\pm$ 252.1 b,c | 1182.0 $\pm$ 75.0 b | 678.1 $\pm$ 335.3 b,c | 1207.4 $\pm$ 64.2 b,c | 22.5 $\pm$ 8.1 a   |
| 21                    | Quercetin 3-rutinoside 2                          | -                    | -                    | -                     | -                   | -                     | -                     | 1.8 $\pm$ 0.4      |
| 22                    | Tanghenioside VII                                 | 44.3 $\pm$ 12.3 b    | 33.9 $\pm$ 5.6 b,c   | 22.8 $\pm$ 4.2 a,b    | 19.5 $\pm$ 7.0 a    | 19.5 $\pm$ 5.9 a      | 82.1 $\pm$ 21.3 c     | -                  |
| 23                    | Isorhamnetin-3- <i>O</i> -rutinoside 1            | -                    | -                    | -                     | -                   | -                     | -                     | 3.0 $\pm$ 0.4      |
| 24                    | Isorhamnetin-3- <i>O</i> -rutinoside 2            | 16.1 $\pm$ 5.4 b     | 5.6 $\pm$ 2.8 a      | 3.6 $\pm$ 0.6 a       | 6.1 $\pm$ 1.1 a     | 8.0 $\pm$ 0.7 a       | 20.3 $\pm$ 5.5 b      | 5.6 $\pm$ 1.5 a    |
| 25                    | Quercetin hexoside                                | 12.2 $\pm$ 7.1 a,b   | 13.6 $\pm$ 8.2 a,b   | 5.3 $\pm$ 0.5 a       | 17.9 $\pm$ 0.3 b    | 19.2 $\pm$ 9.1 b      | 56.4 $\pm$ 4.2 c      | 14.4 $\pm$ 2.0 a,b |
| 26                    | Isorhamnetin-3- <i>O</i> -rutinoside 3            | 7.2 $\pm$ 1.4 a      | 5.1 $\pm$ 1.5 a      | 4.2 $\pm$ 1.2 a       | -                   | -                     | -                     | 2.1 $\pm$ 0.8 a    |
| 27                    | Isorhamnetin-3- <i>O</i> -rutinoside 4            | -                    | -                    | -                     | 4.3 $\pm$ 0.1 a     | 5.0 $\pm$ 0.1 a       | 17.6 $\pm$ 1.2 b      | -                  |
| 28                    | Quercetin derivative 1                            | 9.5 $\pm$ 2.0 b      | 7.3 $\pm$ 4.5 a,b    | 4.0 $\pm$ 0.8 a       | 3.2 $\pm$ 0.3 a     | 3.7 $\pm$ 1.2 a       | 8.4 $\pm$ 1.4 b       | -                  |
| 29                    | Kaempferol dihexoside                             | 42.3 $\pm$ 10.5 b    | 58.2 $\pm$ 4.4 b     | 51.0 $\pm$ 7.4 b      | 39.5 $\pm$ 7.0 b    | 30.3 $\pm$ 5.5 b,c    | 84.7 $\pm$ 9.9 c      | 12.7 $\pm$ 0.7 a   |
| 30                    | Quercetin malonyl-hexoside derivative             | 8.4 $\pm$ 4.8 a      | 12.5 $\pm$ 1.6 a     | 9.2 $\pm$ 3.5 a       | -                   | -                     | -                     | 63.4 $\pm$ 21.3 b  |
| 31                    | Quercetin malonyl-hexoside dimer                  | 28.5 $\pm$ 11.2 a,b  | 29.7 $\pm$ 14.7 a,b  | 15.3 $\pm$ 5.4 a      | 39.2 $\pm$ 3.3 b    | 51.6 $\pm$ 16.2 b     | 39.0 $\pm$ 3.8 b      | -                  |
| 32                    | Quercetin derivative 2                            | -                    | -                    | -                     | -                   | -                     | -                     | 6.4 $\pm$ 1.4      |
| 33                    | Isorhamnetin malonyl- glucoside                   | -                    | -                    | -                     | -                   | -                     | -                     | 58.9 $\pm$ 16.3    |
| 34                    | Isorhamnetin derivative 1                         | 48.8 $\pm$ 37.2 a,b  | 26.4 $\pm$ 11.3 a,b  | 17.1 $\pm$ 4.3 a      | 40.1 $\pm$ 8.4 a,b  | 69.1 $\pm$ 17.2 b     | 255.7 $\pm$ 85.2 c    | -                  |

|    |                           |               |              |             |              |              |                |   |
|----|---------------------------|---------------|--------------|-------------|--------------|--------------|----------------|---|
| 35 | Isorhamnetin derivative 2 | 26.9 ± 20.5 a | 14.5 ± 6.2 a | 9.4 ± 3.5 a | 18.9 ± 4.0 a | 32.5 ± 8.1 a | 106.1 ± 15.4 c | - |
|----|---------------------------|---------------|--------------|-------------|--------------|--------------|----------------|---|

---

PSS-1: *Ph. spicatum* ssp. *spicatum*, populations growing alone; PSS-2: *Ph. spicatum* ssp. *spicatum* growing in sympatry with *Ph. spicatum* ssp. *caeruleum*; PSC: *Ph. spicatum* ssp. *caeruleum*; PO-V: *Ph. ovatum*, populations with violet flowers; PO-DV: *Ph. ovatum*, populations with dark violet flowers; PO-P: *Ph. ovatum*, populations with purple flowers; PP: *Ph. persicifolium*.

**Table S2.** Loadings for the multivariate analysis (PCA) of metabolic compounds in *Phyteuma*.

| Group         | Peak No. | Compound ID                                 | PC 1      | PC 2     |
|---------------|----------|---------------------------------------------|-----------|----------|
| Phenolic acid | 1        | <i>p</i> -Coumaric acid hexoside derivative | -0.27104  | 0.91034  |
| Phenolic acid | 2        | <i>p</i> -Hydroxybenzoic acid hexose        | -0.30071  | -0.65075 |
| Phenolic acid | 3        | <i>p</i> -Coumaric acid derivative          | 0.40916   | 0.67752  |
| Phenolic acid | 4        | Neochlorogenic acid                         | 0.96202   | 0.16777  |
| Phenolic acid | 5        | Chlorogenic acid                            | 0.012282  | -0.72262 |
| Phenolic acid | 6        | Coumaroylquinic acid derivative 1           | -0.014063 | 0.39072  |
| Phenolic acid | 7        | Cryptoclorogenic acid                       | -0.53365  | -0.1665  |
| Phenolic acid | 8        | Feruloylquinic acid derivative 1            | 0.94616   | 0.15984  |
| Phenolic acid | 9        | Ferulic acid hexoside                       | -0.2793   | -0.75317 |
| Phenolic acid | 10       | Caffeoylquinic acid derivative              | 0.95709   | 0.16486  |
| Phenolic acid | 11       | Coumaroylquinic acid derivative 2           | -0.45268  | -0.55895 |
| Phenolic acid | 12       | Feruloylquinic acid derivative 2            | 0.83569   | 0.16697  |
| Phenolic acid | 13       | Coumaroylquinic acid derivative 3           | -0.27131  | -0.75961 |
| Phenolic acid | 14       | Coumaroylquinic acid derivative 4           | -0.69871  | 0.12154  |
| Flavonoid     | 15       | Kaempferol-3- <i>O</i> -rutinoside          | 0.35293   | 0.84087  |
| Flavonoid     | 16       | Luteolin-7-rutinoside glucoside             | -0.28656  | -0.64713 |
| Flavonoid     | 17       | Quercetin hexoside dirhamnoside             | -0.4359   | 0.89083  |
| Flavonoid     | 18       | Quercetin-3-rutinoside 1                    | 0.87483   | 0.44615  |
| Flavonoid     | 19       | Kaempferol derivative 2                     | 0.94842   | 0.1607   |
| Flavonoid     | 20       | Luteolin-7-rutinoside                       | -0.56554  | -0.41884 |
| Flavonoid     | 21       | Quercetin-3-rutinoside 2                    | 0.95087   | 0.17403  |
| Flavonoid     | 22       | Tanghenioside VII                           | -0.73402  | 0.45823  |
| Flavonoid     | 23       | Isorhamnetin-3- <i>O</i> -rutinoside 1      | 0.96157   | 0.1674   |
| Flavonoid     | 24       | Isorhamnetin-3- <i>O</i> -rutinoside 2      | -0.47106  | 0.55442  |
| Flavonoid     | 25       | Quercetin hexoside                          | -0.34704  | 0.88607  |
| Flavonoid     | 26       | Isorhamnetin-3- <i>O</i> -rutinoside 3      | -0.15807  | -0.60507 |
| Flavonoid     | 27       | Isorhamnetin-3- <i>O</i> -rutinoside 4      | -0.43531  | 0.89168  |
| Flavonoid     | 28       | Quercetin derivative 1                      | -0.76714  | 0.016477 |
| Flavonoid     | 29       | Kaempferol dihexoside                       | -0.74083  | 0.31451  |
| Flavonoid     | 30       | Quercetin malonyl-hexoside derivative 1     | 0.93298   | 0.002287 |
| Flavonoid     | 31       | Quercetin malonyl-hexoside dimer            | -0.68697  | 0.21176  |
| Flavonoid     | 32       | Quercetin derivative 2                      | 0.9352    | 0.15612  |
| Flavonoid     | 33       | Isorhamnetin malonyl-glucoside              | 0.94774   | 0.17415  |
| Flavonoid     | 34       | Isorhamnetin derivative 1                   | -0.55206  | 0.78542  |
| Flavonoid     | 35       | Isorhamnetin derivative 2                   | -0.56797  | 0.75587  |
| Anthocyanin   | 1        | Delphinidin-3-rutinoside                    | -0.22487  | 0.35098  |
| Anthocyanin   | 2        | Cyanidin-3-rutinoside                       | -0.3231   | 0.88887  |
| Anthocyanin   | 3        | Peonidin-3-glucoside                        | -0.29987  | 0.051944 |
| Anthocyanin   | 4        | Delphinidin rutinoside derivative           | 0.96074   | 0.17255  |
| Anthocyanin   | 5        | Petunidin-3-rutinoside derivative           | -0.089675 | 0.088361 |
| Anthocyanin   | 6        | Pelargonidin-3-rutinoside derivative        | -0.27085  | 0.84297  |
| Anthocyanin   | 7        | Delphinidin hexoside derivative             | 0.93093   | 0.15472  |

**Figure S1.** HPLC chromatograms of *Phyteuma* species at 530 nm. (A) *Ph. spicatum* ssp. *Spicatum*; (B) *Ph. spicatum* ssp. *caeruleum*; (C) *Ph. ovatum*, populations with violet flowers.

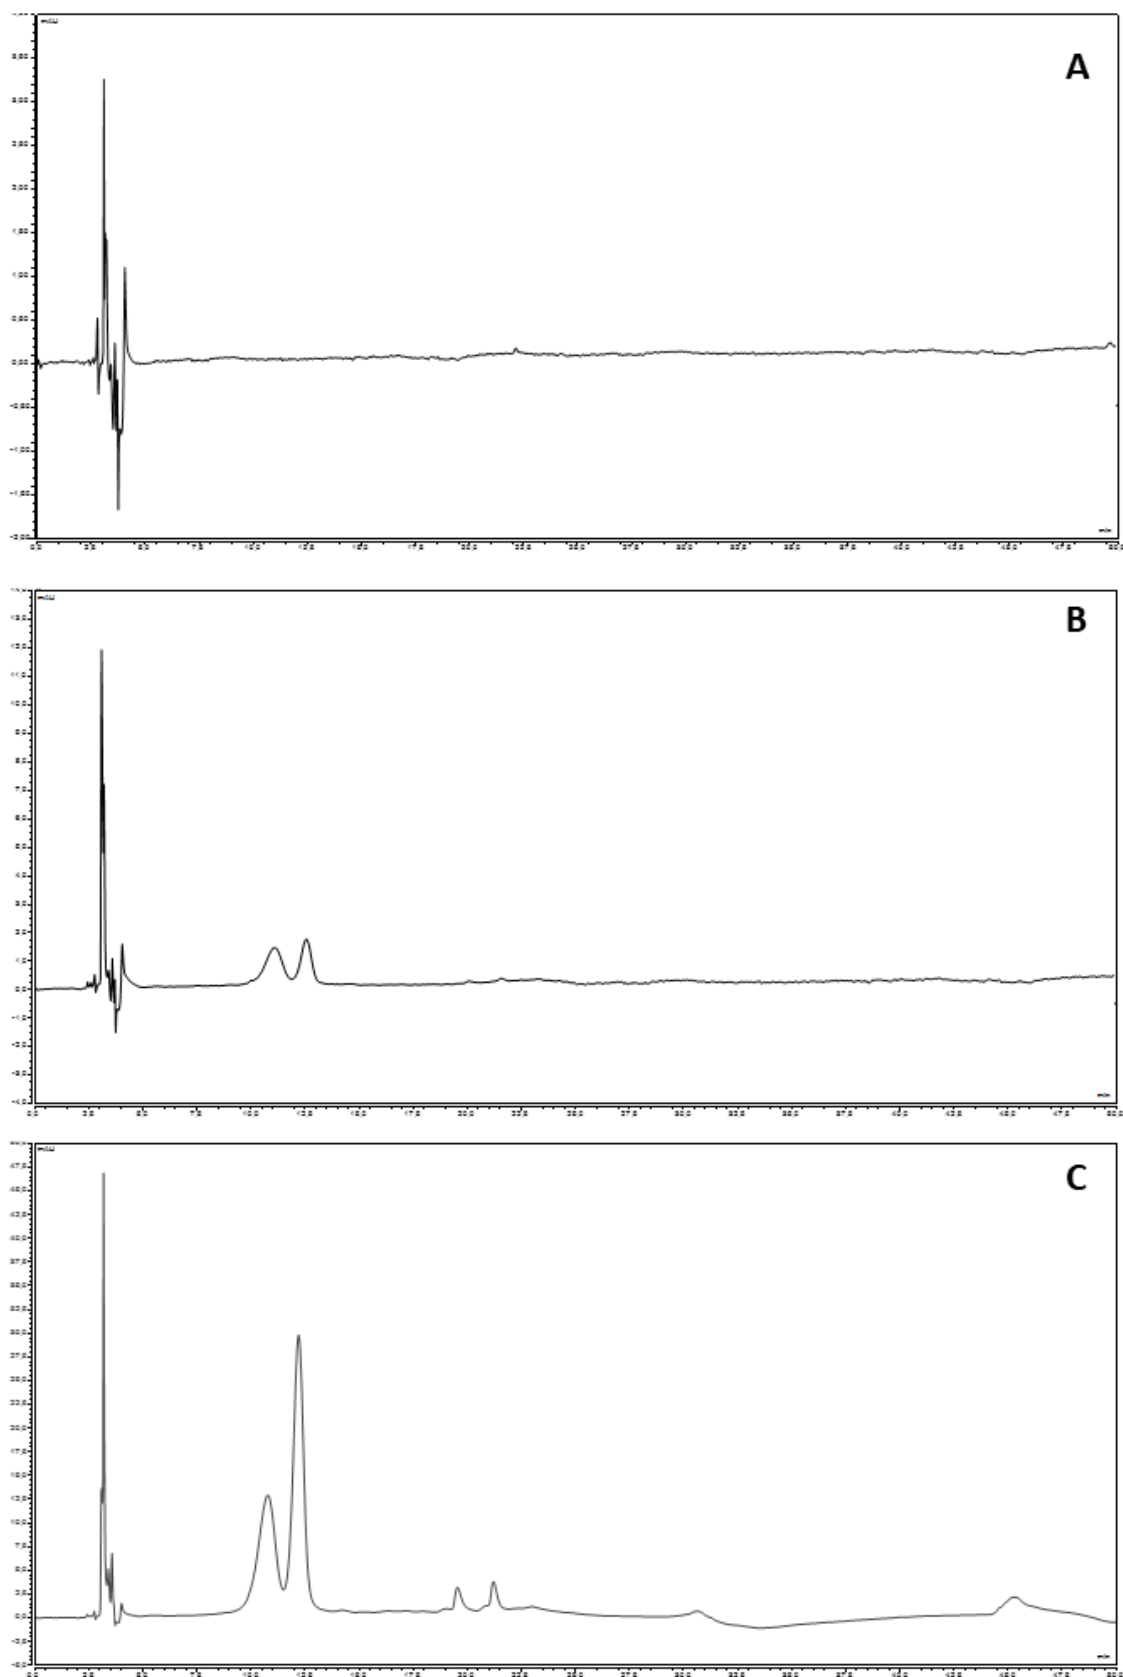

**Figure S2.** HPLC chromatograms of *Phyteuma* species at 530 nm (cont.). (A) *Ph. ovatum*, populations with dark violet flowers; (B) *Ph. ovatum*, populations with purple flowers; (C) *Ph. persicifolium*.

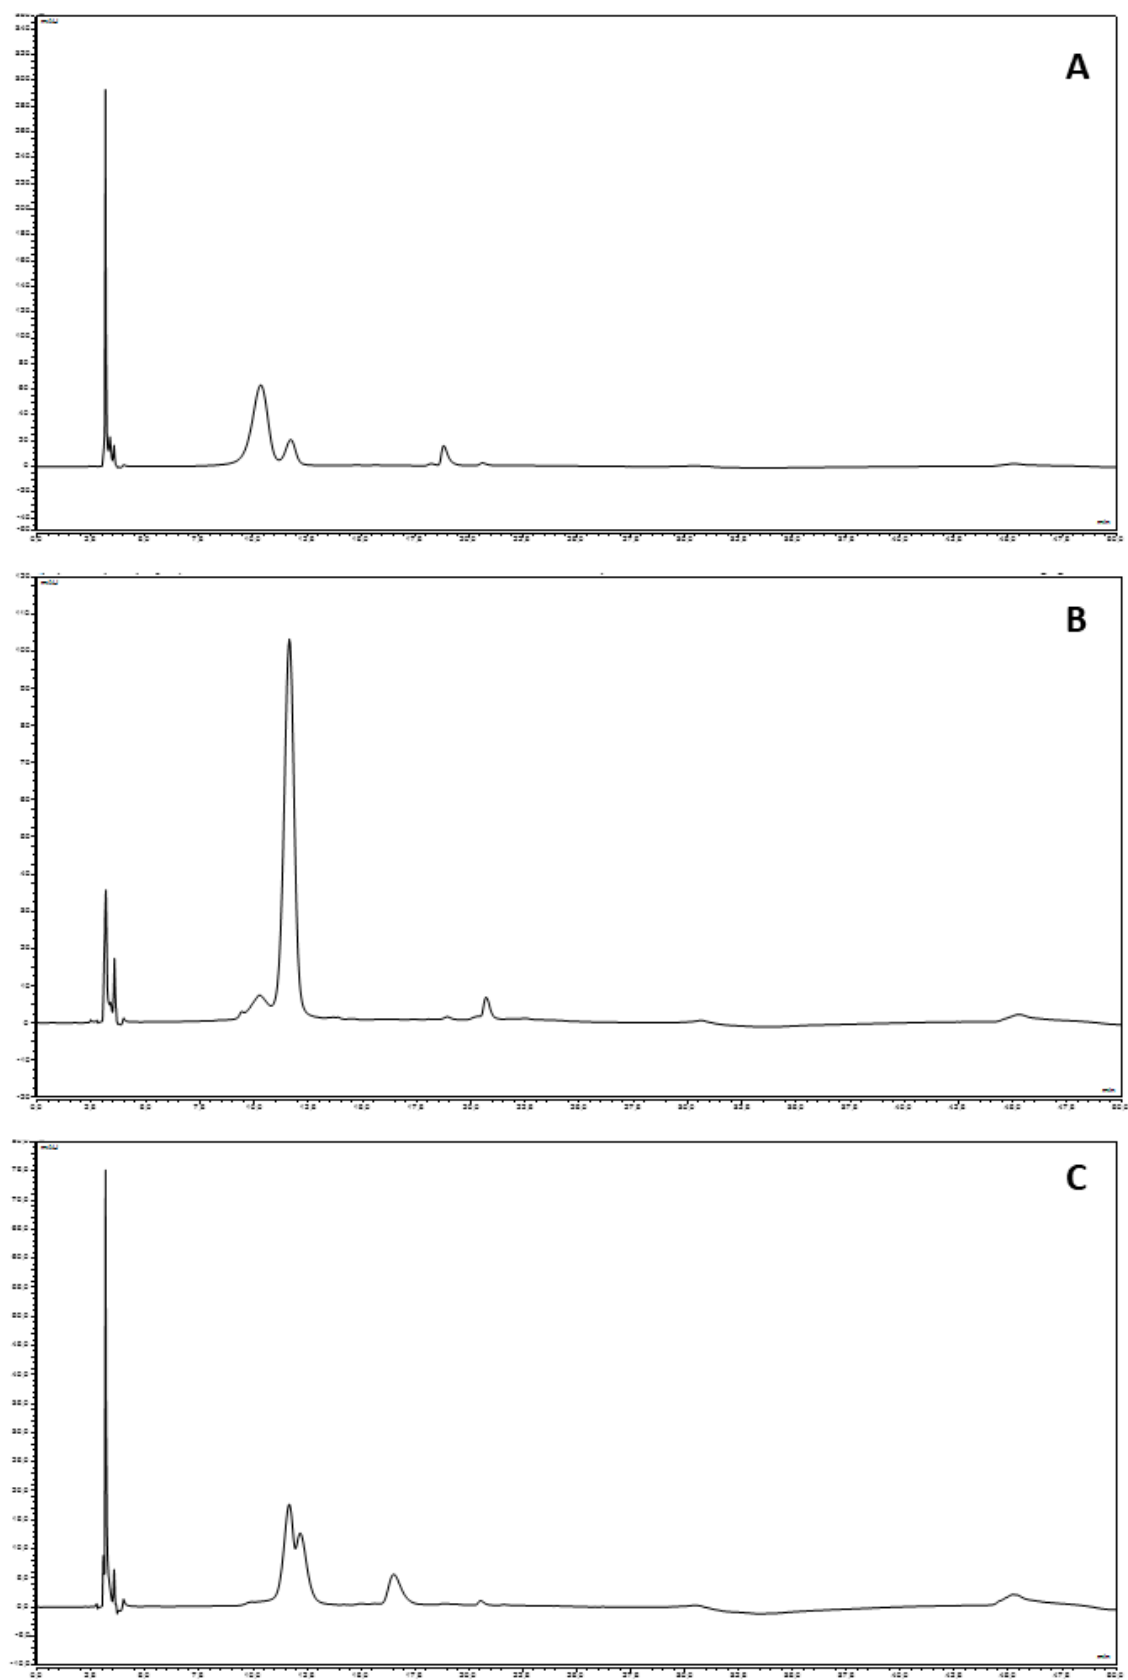

**Table S3.** Key to populations of *Phyteuma* included in this work.

**Key to populations of *Phyteuma* in Slovenia**

1. Flowers white or light-violet. Colorimetric parameters:  $L > 45$ ,  $a < 2$ ,  $b < 45$ ,  $C < 35$ ,  $h < 280$  ..... 2
  2. Anthocyanins absent or in traces ..... **PSS**
  - 2'. Anthocyanins present (D3R, C3R, Po3G) ..... **PSC**
- 1'. Flowers violet, blue or purple. Colorimetric parameters:  $L < 45$ ,  $a > 2$ ,  $b > 45$ ,  $C > 35$ ,  $h > 280$  ..... 3
  3. Anthocyanins D3R:C3R ratio 1:100. Presence of neochlorogenic acid and isorhamnetin malonyl-glucoside ..... **PP**
  - 3'. Anthocyanins D3R:C3R ratio 1:1 to 1:25. Absence of neochlorogenic acid and isorhamnetin malonyl-glucoside ..... 4
    4. Presence of PIRd. Colorimetric parameters:  $a > 8$ ,  $h < 300$  ..... **PO-V and PO-DV**
    - 4'. Absence of PIRd. Colorimetric parameters:  $a < 6$ ,  $h > 300$  ..... **PO-P**
